# Supplementary material for: Evaluation of Antibody Tests for Mycobacterium bovis Infection in Pigs and Deer
Source: MDPI journal article supplement (doi:10.3390/vetsci10080489), 2023-07-27
Supplement: s1 [file s1]

**Table S1. Pig Tests - Parallel interpretation for Higher Sensitivity.**

|                     | TB-free                  |           | TB-positive             |           |
|---------------------|--------------------------|-----------|-------------------------|-----------|
|                     | % Specificity<br>(n=402) |           | % Sensitivity<br>(n=29) |           |
|                     | %                        | %         | %                       | 95% CI    |
| IDEXX/DPP VetTB     | <b>99.0</b>              | 98.0-100  | <b>82.8</b>             | 69.0-96.5 |
| IDEXX/PPD ELISA     | <b>98.3</b>              | 97.0-99.6 | <b>72.4</b>             | 56.1-88.7 |
| IDEXX/Enferplex     | <b>98.5</b>              | 97.3-99.7 | <b>86.2</b>             | 73.6-98.8 |
| DPP VetTB/PPD ELISA | <b>99.0</b>              | 98.0-100  | <b>82.8</b>             | 69.0-96.5 |
| Enferplex/DPP VetTB | <b>99.3</b>              | 98.5-100  | <b>93.1</b>             | 83.9-100  |
| Enferplex/PPD ELISA | <b>98.5</b>              | 97.3-99.7 | <b>86.2</b>             | 73.6-98.8 |

**Table S2. Pig Tests - Serial interpretation for Higher Specificity.**

|                     | TB-free                  |          | TB-positive             |           |
|---------------------|--------------------------|----------|-------------------------|-----------|
|                     | % Specificity<br>(n=402) |          | % Sensitivity<br>(n=29) |           |
|                     | %                        | 95% CI   | %                       | 95% CI    |
| IDEXX/DPP VetTB     | <b>100</b>               |          | <b>72.4</b>             | 56.1-88.7 |
| IDEXX/PPD ELISA     | <b>99.8</b>              | 99.4-100 | <b>62.1</b>             | 44.4-79.8 |
| IDEXX/Enferplex     | <b>99.8</b>              | 99.4-100 | <b>72.4</b>             | 56.1-88.7 |
| DPP VetTB/PPD ELISA | <b>100</b>               |          | <b>62.1</b>             | 44.4-79.8 |
| Enferplex/DPP VetTB | <b>100</b>               |          | <b>75.9</b>             | 60.3-91.5 |
| Enferplex/PPD ELISA | <b>99.8</b>              | 99.4-100 | <b>62.1</b>             | 44.4-79.8 |

**Table S3. Deer Tests - Parallel interpretation for Higher Sensitivity.**

| Parallel – High Se  | TB-free                  |           | Farmed TB-positive      |           | Park/Wild TB-positive    |           |
|---------------------|--------------------------|-----------|-------------------------|-----------|--------------------------|-----------|
|                     | % Specificity<br>(n=410) |           | % Sensitivity<br>(n=77) |           | % Sensitivity<br>(n=105) |           |
| Combined Tests:     | %                        | 95% CI    | %                       | 95% CI    | %                        | 95% CI    |
| IDEXX/DPP VetTB     | <b>98.3</b>              | 97-99.6   | <b>83.1</b>             | 74.7-91.5 | <b>60</b>                | 50.6-69.4 |
| IDEXX/PPD ELISA     | <b>98.05</b>             | 96.7-99.4 | <b>84.4</b>             | 76.3-92.5 | <b>56.2</b>              | 46.7-65.7 |
| IDEXX/Enferplex     | <b>98.8</b>              | 97.7-99.9 | <b>88.3</b>             | 81.1-95.5 | <b>59</b>                | 49.6-68.4 |
| DPP VetTB/PPD ELISA | <b>98.05</b>             | 96.7-99.4 | <b>88.3</b>             | 81.1-95.5 | <b>60</b>                | 50.8-69.4 |
| Enferplex/DPP VetTB | <b>98.54</b>             | 97.4-99.7 | <b>91</b>               | 84.6-97.4 | <b>61</b>                | 51.7-70.3 |
| Enferplex/PPD ELISA | <b>98.8</b>              | 97.7-99.9 | <b>88.3</b>             | 81.1-95.5 | <b>57.1</b>              | 47.6-66.7 |



**Table S4. Deer Tests - Serial interpretation for Higher Specificity.**

| Serial – High Se    | TB-free                   |          | Farmed TB-positive      |           | Park/Wild TB-positive    |           |
|---------------------|---------------------------|----------|-------------------------|-----------|--------------------------|-----------|
|                     | % Specificity<br>(n=402?) |          | % Sensitivity<br>(n=77) |           | % Sensitivity<br>(n=105) |           |
| Combined Tests:     | %                         | 95% CI   | %                       | 95% CI    | %                        | 95% CI    |
| IDEXX/DPP VetTB     | <b>99.76</b>              | 99.3-100 | <b>71.4</b>             | 60.9-81.1 | <b>53.3</b>              | 43.8-62.8 |
| IDEXX/PPD ELISA     | <b>100</b>                |          | <b>74</b>               | 64.2-83.8 | <b>50.5</b>              | 40.9-60.1 |
| IDEXX/Enferplex     | <b>99.76</b>              | 99.3-100 | <b>75.3</b>             | 65.7-84.9 | <b>52.4</b>              | 42.8-62   |
| DPP VetTB/PPD ELISA | <b>100</b>                |          | <b>68.8</b>             | 58.5-79.1 | <b>48.6</b>              | 39-58.2   |
| Enferplex/DPP VetTB | <b>100</b>                |          | <b>72.7</b>             | 62.7-82.7 | <b>53.3</b>              | 43.8-62.8 |
| Enferplex/PPD ELISA | <b>99.76</b>              | 99.3-100 | <b>77.9</b>             | 68.6-87.2 | <b>50.5</b>              | 40.9-60.1 |
